# Supplementary material for: One-pot photocatalysis-assisted adsorptive desulfurization of diesel over doped-TiO2under ambient conditions
Source: Royal Society of Chemistry journal article supplement (doi:10.1039/c4ra09680k), 2014-10-16
Supplement: c4ra09680k1.pdf [file c4ra09680k1.pdf]

# One-pot photocatalysis-assisted adsorptive desulfurization of diesel over doped-TiO<sub>2</sub> under ambient conditions

Xun Wang,<sup>a</sup> Wei Zhang,<sup>a</sup> Luoming Wu,<sup>b</sup> Feiyan Ye,<sup>b</sup> Jing Xiao<sup>\*a</sup> and Zhong Li<sup>\*b</sup>

## Experimental

A series of Ti<sub>1-x</sub>Si<sub>x</sub>O<sub>2</sub> adsorbents with varied Ti/Si molar ratio (10/0, 9/1, 7/3, 5/5, 3/7, 1/9, 0/10) were prepared by a sol-gel method. Given amounts of titanium ethoxide (TNBT, Ti(OC<sub>2</sub>H<sub>5</sub>)<sub>4</sub>, Ti-20% Aldrich), tetraethylorthosilicate (TEOS, 98% Aldrich), and acetic acid were mixed and dissolved in ethanol (99.5%, Aldrich), which was denoted as solution A. Given amounts of nitric acid (70%, Aldrich) and distilled water were mixed and dispersed into ethanol, which was denoted as solution B. The weight ratio of (TEOS+TNBT): EtOH: H<sub>2</sub>O: CH<sub>3</sub>COOH: HNO<sub>3</sub> was set as 1: 20: 7: 2: 0.01. A transparent sol was formed by doping solution B into solution A drop by drop, and then settled at 50 °C forming gel. The gel was then dried at 80 °C for 48 h, and then calcined at 400 °C for 4 h. BET surface area (S<sub>BET</sub>) was characterized by N<sub>2</sub> adsorption test at 77 K using an ASAP 2020 analyzer (Micromeritics). For comparison, Ti<sub>0.9</sub>Ce<sub>0.1</sub>O<sub>2</sub> metal oxides (prepared by a urea precipitation method<sup>3</sup>, S<sub>BET</sub> of 249 m<sup>2</sup>/g); P25 TiO<sub>2</sub> (Degussa, S<sub>BET</sub> of 56 m<sup>2</sup>/g), TS-1 (Shentan Chemicals, Shanghai, S<sub>BET</sub> of 320 m<sup>2</sup>/g), and MCM-41 (Zhuoyue Chemicals, Shanghai, S<sub>BET</sub> of 1200 m<sup>2</sup>/g), were used as references.

The real diesel with 220 ppmw-S was provided by Guangdong Petrochemical Corporation. The model fuel was prepared by dissolving 320 ppmw-S of dibenzothiophene (DBT, Sigma-Aldrich, 98%) into tetrahexane (Sigma-Aldrich, 99%).

ADS experiments were carried out in a batch reactor setup with the schematic diagram as shown in Figure S1. A water-cooled condenser was installed above the batch reactor to avoid liquid loss (~3%). Ti<sub>1-x</sub>Si<sub>x</sub>O<sub>2</sub> adsorbent and fuel were mixed in the reactor (fuel-to-adsorbent weight ratio of 10 for real diesel, and 20 for model fuel), a constant air flow at 10 ml/min was bubbled into the adsorbent/fuel mixture. UV light irradiation was provided by a built-in 400 W high pressure mercury lamp (Leman, China). The treated fuels were sampled periodically (terminated in 6 h). The sulfur concentrations in initial and desulfurized fuels were monitored using an Antek 9000 series total sulfur analyzer. Sulfur species in treated fuels were qualified using a HP 5890 gas chromatograph (XTI-5 column from Restek, 30 m × 0.25 mm) equipped with a pulsed flame photometric detector (PFPD). To identify the sulfur species on the spent Ti<sub>1-x</sub>Si<sub>x</sub>O<sub>2</sub> adsorbent, a polar solvent of acetonitrile (Sigma-Aldrich, 99.8%) was used to wash the spent adsorbent, and the eluent was characterized by a gas-chromatograph/mass spectrometer (GCMS-QP 2010, SHIMADZU) equipped with capillary DB-1 (30 m × 0.25 mm × 1 μm). The detailed temperature program setup was reported elsewhere<sup>1</sup>.

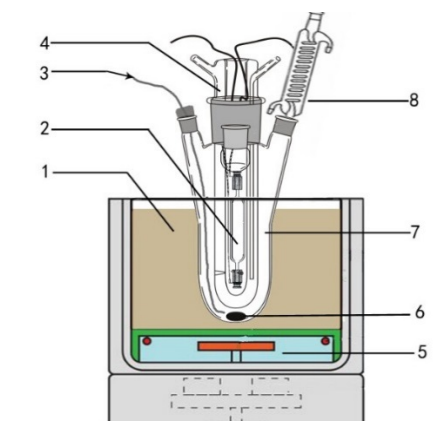

1-oil bath; 2-built-in lamp; 3-air inlet; 4-condensing interlayer; 5-blender; 6-stirrer bar; 7-fuel; 8-condenser

**Figure S1.** Schematic diagram of the batch reactor setup for photocatalysis-assisted ADS of fuel

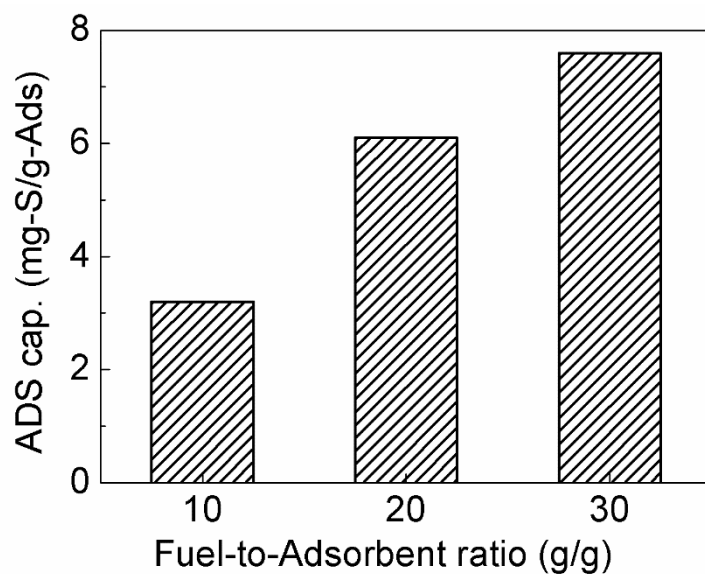

**Figure S2.** Desulfurization capacities of the  $\text{Ti}_{0.3}\text{Si}_{0.7}\text{O}_2$  at different fuel-to-adsorbent ratios

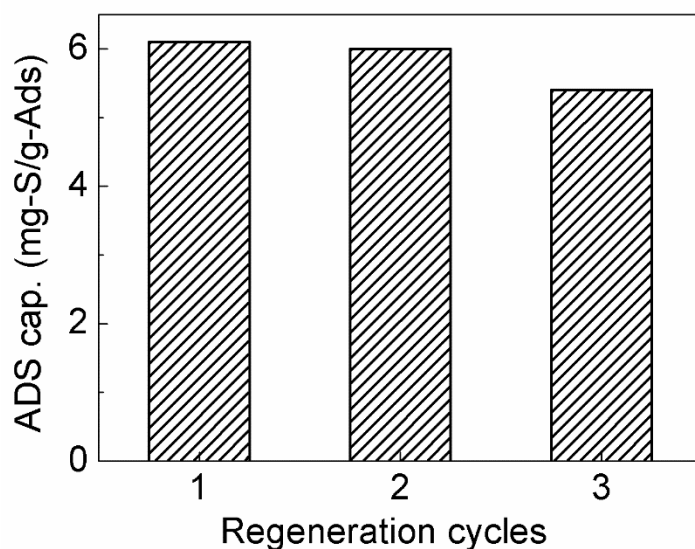

**Figure S3.** Desulfurization capacities of the  $\text{Ti}_{0.3}\text{Si}_{0.7}\text{O}_2$  in the first three regeneration cycles (Regeneration method: the spent Ti-Si-O was washed with excess amount of acetonitrile followed by oxidative air treatment at 400 °C)

## References

- 1 W. Zhang, H. Zhang, J. Xiao, Z. X. Zhao, M. X. Yu and Z. Li, *Green Chem.*, 2014, 16, 211–220.
